# Supplementary material
Source: publisher figshare collection journal article supplement (https://plos.figshare.com/articles/dataset/_/140055)
Supplement: Supplementary file [file 1]

Figure S1 displays the normalized power ratios for the four brain regions of interest in separate labeled panels as a function of the noise level for the Left Standard 30-50 Hz frequency window (top) and for the Right Standard Custom frequency window (bottom). Figure 2 of the main text displays the complementary data, Left Standard custom window and Right Standard 30-50 Hz window.

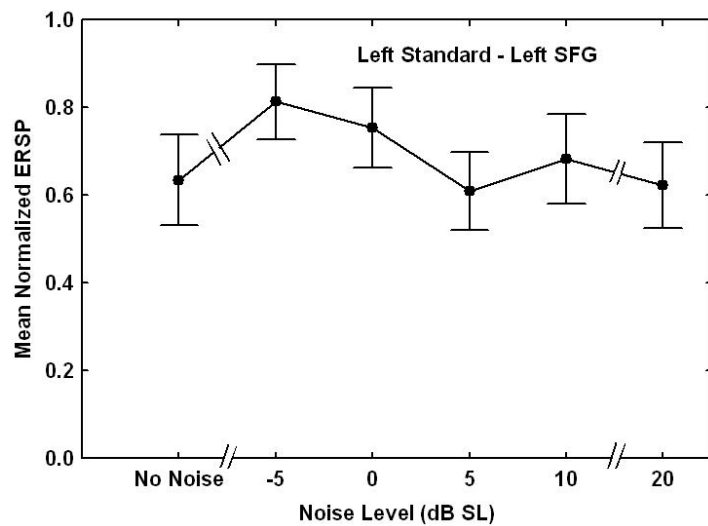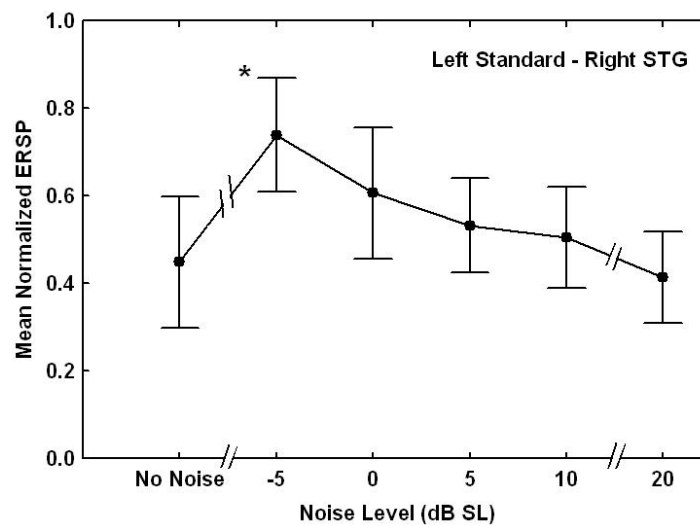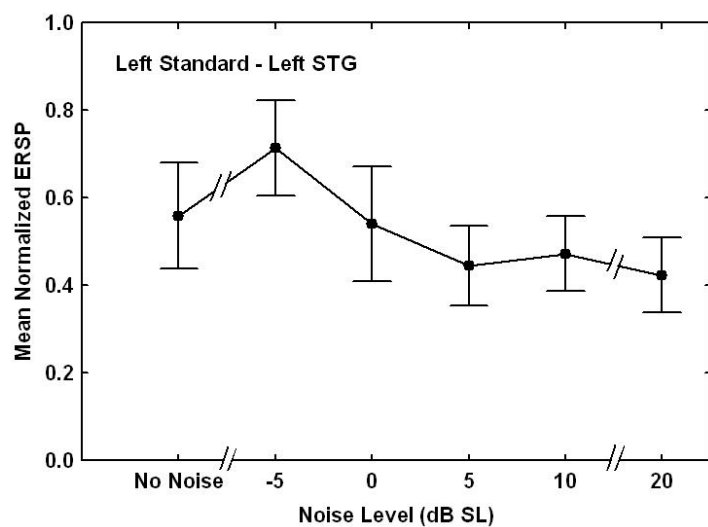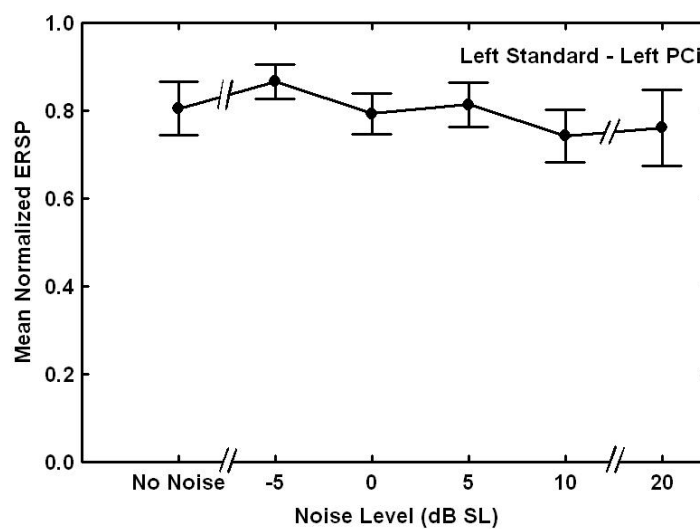

Left Standards 30-50 Hz Window

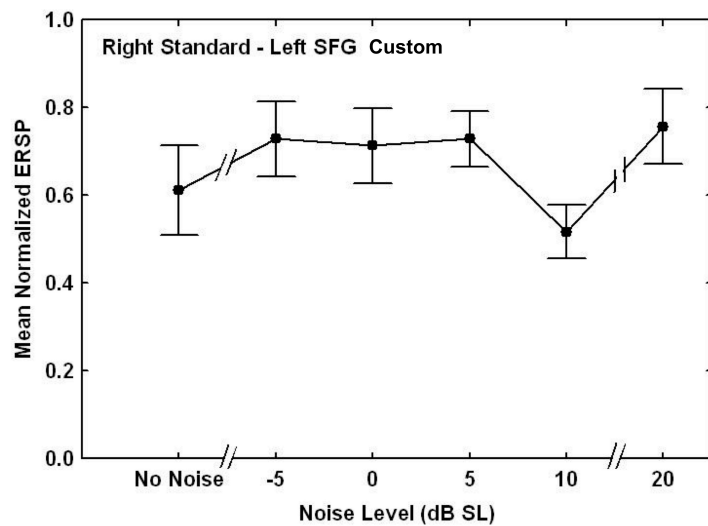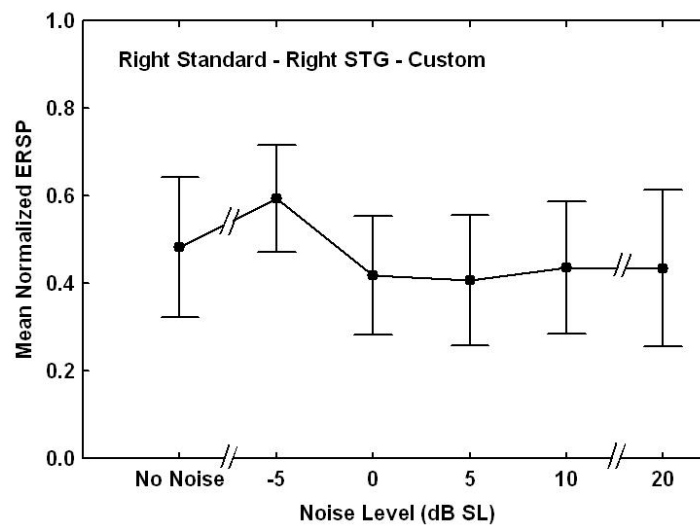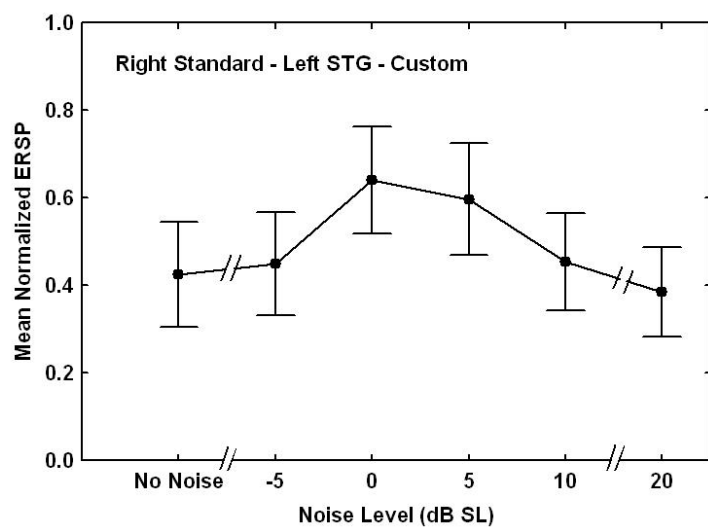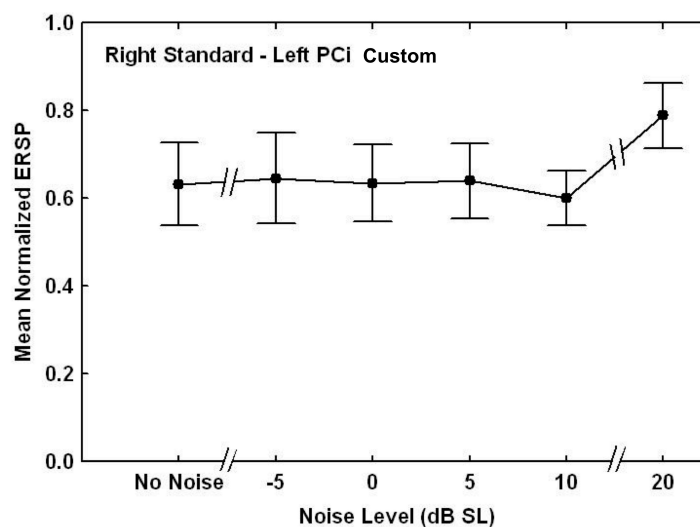

Right Standards Custom Window
